# Supplementary material for: Two isostructural Ln-MOFs showing luminescent sensing (Eu) and slow magnetic relaxation (Dy) properties
Source: Royal Society of Chemistry journal article supplement (doi:10.1039/c8dt03458c), 2018-01-01
Supplement: c8dt03458c1.pdf [file c8dt03458c1.pdf]

Supporting Information for

**Luminescent Sensing and Slow Magnetic Relaxation Properties in Two Isostructural Ln-MOFs**

*Chun Yang,<sup>a</sup> Jie-Yu Zheng,<sup>b</sup> Wen-Jing Cai,<sup>a</sup> Fu-Sheng Guo<sup>\*a</sup> and Yao-Yu Wang<sup>\*a</sup>*

*<sup>a</sup> Key Laboratory of Synthetic and Natural Functional Molecule Chemistry of the Ministry of Education, Shaanxi Key Laboratory of Physico-Inorganic Chemistry, College of Chemistry & Materials Science, Northwest University, Xi'an, 710127 (P.R.China)*

*e-mail: [guofush@hotmail.com](mailto:guofush@hotmail.com); [wyaoyu@nwu.edu.cn](mailto:wyaoyu@nwu.edu.cn)*

*<sup>b</sup> Key Laboratory of Bioinorganic and Synthetic Chemistry of Ministry of Education, School of Chemistry, Sun Yat-Sen University, 510275 Guangzhou, P. R. China.*

**Materials and General Methods** All the reagents and solvents were purchased from commercial sources and used directly without further purification.

Elemental analyses (C, H, and N) were performed on a PerkinElmer 2400C elemental analyzer. The powder X-ray diffraction (PXRD) was collected by using a Bruker D8 ADVANCE X-ray powder diffractometer (Cu  $K\alpha$ ,  $\lambda = 1.5418 \text{ \AA}$ ) with  $2\theta$  (5-50°). A luminescent spectrum was measured on an Edinburgh FLS55 luminescence spectrometer. Magnetic measurements were measured by using a Quantum Design MPMSXL-7 SQUID magnetometer on polycrystalline samples.

Experimental procedure of luminescence and PXRD for sensing ions: Crystalline samples of **1-Eu** were immersed in the individual aqueous solutions of different salt solutions, and the suspensions were obtained by being sonicated for 30 minutes. Then the luminescence spectra of the obtained dispersions were recorded. When the crystalline samples settled down after one day, the precipitates were used to do PXRD measurements.

**Synthesis of H<sub>2</sub>L.** The ligand of 5-((pyridin-4-ylthio)methyl)isophthalic acid was prepared by mixing 4-mercaptopyridine and 5-(bromomethyl)isophthalic acid in water at refluxing temperature for 24 hours. After cooling down to room temperature, the white solid of H<sub>2</sub>L was collected by filtration with a yield of 85%. IR/cm<sup>-1</sup> (KBr): 3438 (m), 3084 (m), 2972 (w), 2790 (w), 2517 (m), 2148 (w), 2031 (w), 1865 (w), 1672 (s), 1620 (s), 1475 (s), 1348 (m), 1265 (s), 1209 (s), 1105 (s), 974 (m), 912 (m), 860 (w), 812 (s), 771 (s), 687 (s), 611 (m), 484 (w), 426 (m). <sup>1</sup>H NMR (400 MHz, DMSO):  $\delta$ : 4.55 (s, 2H), 7.32–7.34 (m, 2H), 8.25 (d,  $J = 1.5 \text{ Hz}$ , 2H), 8.34–8.37 (m, 3H), 13.34 (s, 2H).

**Synthesis of [Ln(HL)L]·H<sub>2</sub>O (Ln = Eu, Dy)** A mixture of Ln(NO<sub>3</sub>)<sub>2</sub>·6H<sub>2</sub>O (0.1mmol), H<sub>2</sub>L(0.05mmol, 0.0145g), DMA-H<sub>2</sub>O (2:2, 4 mL) was sealed in a 25 mL Teflon-lined stainless steel vessel, which was then heated at 120°C for 72 h. After cooling down to room temperature at a rate of 5°C min<sup>-1</sup>, colorless needle shaped crystals were obtained.

**[Eu(HL)L]·H<sub>2</sub>O (1-Eu):** Yield. 58% (based on H<sub>2</sub>L). Calcd for C<sub>28</sub>H<sub>21</sub>EuN<sub>2</sub>O<sub>9</sub>S<sub>2</sub>(%): C, 45.11; H, 2.84; N, 3.76. Found: C,44.55; H, 2.30; N, 3.90. IR/cm<sup>-1</sup> (KBr): 3410 (w), 3219 (w), 3053 (w), 2925 (w), 1629 (s), 1564 (s), 1452 (s), 1373 (s), 1250 (w), 1201 (w), 1107 (m), 928 (w), 787 (m), 715 (m), 593 (w), 489 (w), 433 (w).

**[Dy(HL)L]·H<sub>2</sub>O (1-Dy):** Yield. 60% (based on H<sub>2</sub>L). Calcd for C<sub>28</sub>H<sub>21</sub>DyN<sub>2</sub>O<sub>9</sub>S<sub>2</sub>(%): C, 44.48; H, 2.80; N, 3.71. Found: C,44.42. H, 2.30. N, 3.70. IR/cm<sup>-1</sup> (KBr): 3410 (W), 3219 (w), 3055 (w), 2927 (w), 1624 (s), 1562 (s), 1452 (s), 1373 (s), 1250 (w), 1205 (w), 1107 (m), 928 (w), 787 (m), 715 (m), 592 (w), 488 (w), 434 (w).

### X-ray Data Collection and Structure Determination

Single-crystal X-ray diffraction measurements of **1-Eu** and **1-Dy** were performed on Bruker Apex-II CCD. The structures were solved by the direct methods and refined by full-matrix least-squares refinements based on  $F^2$  with the SHELXTL program. Anisotropic thermal parameters were applied to non-hydrogen atoms, and all hydrogen atoms from the organic ligands were calculated and added at idealized positions. Other details of relevant crystallographic data are given in Table S1, and the selected bond lengths and angles

were listed in Tables S2 and S3.

**Table S1.** Crystal Data and Structure Refinement of **1-Ln**.

| <b>Compound reference</b>                                                                  | <b>1-Eu</b>                                                                    | <b>1-Dy</b>                                                                    |
|--------------------------------------------------------------------------------------------|--------------------------------------------------------------------------------|--------------------------------------------------------------------------------|
| Chemical formula                                                                           | C <sub>28</sub> H <sub>21</sub> EuN <sub>2</sub> O <sub>9</sub> S <sub>2</sub> | C <sub>28</sub> H <sub>21</sub> DyN <sub>2</sub> O <sub>9</sub> S <sub>2</sub> |
| Formula Mass                                                                               | 745.55                                                                         | 756.09                                                                         |
| Crystal system                                                                             | Monoclinic                                                                     | Monoclinic                                                                     |
| <i>a</i> /Å                                                                                | 14.249(4)                                                                      | 14.2186(19)                                                                    |
| <i>b</i> /Å                                                                                | 12.490(4)                                                                      | 12.5012(16)                                                                    |
| <i>c</i> /Å                                                                                | 15.997(4)                                                                      | 15.946(2)                                                                      |
| <i>a</i> /°                                                                                | 90                                                                             | 90                                                                             |
| <i>b</i> /°                                                                                | 109.471(8)                                                                     | 109.894(2)                                                                     |
| <i>g</i> /°                                                                                | 90                                                                             | 90                                                                             |
| Unit cell volume/Å <sup>3</sup>                                                            | 2684.1(14)                                                                     | 2665.3(6)                                                                      |
| Temperature/K                                                                              | 296.15                                                                         | 296.15                                                                         |
| Space group                                                                                | <i>P</i> 2 <sub>1</sub> / <i>n</i>                                             | <i>P</i> 2 <sub>1</sub> / <i>n</i>                                             |
| No. of formula units per unit cell, <i>Z</i>                                               | 4                                                                              | 4                                                                              |
| <i>r</i> <sub>calc</sub> /g cm <sup>-3</sup>                                               | 1.845                                                                          | 1.894                                                                          |
| Absorption coefficient, μ/mm <sup>-1</sup>                                                 | 2.553                                                                          | 3.037                                                                          |
| F(000)                                                                                     | 1480.0                                                                         | 1492.0                                                                         |
| Crystal size/mm <sup>3</sup>                                                               | 0.15 × 0.12 × 0.1                                                              | 0.12 × 0.1 × 0.08                                                              |
| 2θ range for data collection/°                                                             | 4.654 to 50.678                                                                | 3.326 to 51.996                                                                |
| No. of reflections measured                                                                | 48232                                                                          | 14028                                                                          |
| No. of independent reflections                                                             | 4889                                                                           | 5175                                                                           |
| <i>R</i> <sub>int</sub>                                                                    | 0.0438                                                                         | 0.0468                                                                         |
| Final <i>R</i> <sub>1</sub> <sup>a</sup> values ( <i>I</i> > 2σ( <i>I</i> ))               | 0.0215                                                                         | 0.0368                                                                         |
| Final <i>wR</i> <sub>2</sub> ( <i>F</i> <sup>2</sup> ) values ( <i>I</i> > 2σ( <i>I</i> )) | 0.0508                                                                         | 0.1065                                                                         |
| Final <i>R</i> <sub>1</sub> values (all data)                                              | 0.0255                                                                         | 0.0524                                                                         |
| Final <i>wR</i> <sub>2</sub> ( <i>F</i> <sup>2</sup> ) values (all data)                   | 0.0530                                                                         | 0.1421                                                                         |
| Goodness of fit on <i>F</i> <sup>2</sup>                                                   | 1.059                                                                          | 1.057                                                                          |
| CCDC number                                                                                | 1862728                                                                        | 1862729                                                                        |

<sup>a</sup>  $R_1 = \sum ||F_o| - |F_c|| / \sum |F_o|$ , <sup>b</sup>  $wR_2 = [\sum w(F_o^2 - F_c^2)^2 / \sum w(F_o^2)]^{1/2}$

**Table S2.** Selected bonds lengths [Å] and angles [°] for **1-Eu**.

|                |            |                |           |
|----------------|------------|----------------|-----------|
| Eu1-O1         | 2.373(2)   | O2#1-Eu1-O8#3  | 82.91(8)  |
| Eu1-O2#1       | 2.345(2)   | O3#2-Eu1-O7#3  | 80.76(7)  |
| Eu1-O3#2       | 2.487(2)   | O4#2-Eu1-O3#3  | 53.13(7)  |
| Eu1-O4#2       | 2.435(2)   | O4#2-Eu1-O7#3  | 72.87(8)  |
| Eu1-O5         | 2.3699(19) | O4#2- Eu1-O8#3 | 107.62(7) |
| Eu1-O6#1       | 2.369(2)   | O5-Eu1-O1      | 74.28(7)  |
| Eu1-O7#3       | 2.566(2)   | O5-Eu1-O3#2    | 98.31(7)  |
| Eu1-O8#3       | 2.484(2)   | O5-Eu1-O4#2    | 147.85(7) |
| O1-Eu1-O3#2    | 78.87(7)   | O5-Eu1-O7#3    | 121.56(7) |
| O1-Eu1-O4#2    | 84.66(8)   | O5-Eu1-O8#3    | 71.93(7)  |
| O1-Eu1-O7#3    | 155.94(7)  | O6#1-Eu1-O1    | 78.53(7)  |
| O1-Eu1-O8#3    | 132.09(7)  | O6#2-Eu1-O3#2  | 123.61(7) |
| O2#1-Eu1-O1    | 124.59(7)  | O6#2-Eu1-O4#2  | 73.85(7)  |
| O2#1-Eu1-O3#2  | 154.98(7)  | O6#2-Eu1-O5    | 123.52(7) |
| O2#1- Eu1-O4#2 | 130.07(7)  | O6#2- Eu1-O7#3 | 102.64(7) |
| O2#1-Eu1-O5    | 82.08(7)   | O6#2-Eu1-O8#3  | 149.22(7) |
| O2#1-Eu1-O6#1  | 74.25(7)   | O8#3-Eu1-O3#2  | 73.59(8)  |
| O2#1-Eu1-O7#3  | 77.90(7)   | O8#3-Eu1-O7#3  | 51.56(6)  |

Symmetry transformations used to generate equivalent atoms: #1: 1-x, 1-y, 1-z; #2: -1/2+x, 1/2-y, -1/2+z; #3: -1/2+x, 3/2-y, -1/2+z.

**Table S3.** Selected bonds lengths [Å] and angles [°] for **1-Dy**.

|               |            |                |            |
|---------------|------------|----------------|------------|
| Dy1-O1        | 2.324(4)   | O2#1-Dy1-O8#3  | 82.76(15)  |
| Dy1-O2#1      | 2.299(4)   | O3#2- Dy1-O7#3 | 81.50(15)  |
| Dy1-O3#2      | 2.456(4)   | O4#2- Dy1-O3#3 | 54.06(15)  |
| Dy1-O4#2      | 2.396(5)   | O4#2- Dy1-O7#3 | 72.62(17)  |
| Dy1-O5        | 2.320(4)   | O4#2- Dy1-O8#3 | 107.88(16) |
| Dy1-O6#1      | 2.320(4)   | O5- Dy1-O1     | 74.30(15)  |
| Dy1-O7#3      | 2.536(4)   | O5-Dy1-O3#2    | 97.53(15)  |
| Dy1-O8#3      | 2.446(4)   | O5-Dy1-O4#2    | 148.06(16) |
| O1-Dy1-O3#2   | 78.62(15)  | O5-Dy1-O7#3    | 121.95(15) |
| O1-Dy1-O4#2   | 84.77(17)  | O5-Dy1-O8#3    | 71.55(14)  |
| O1-Dy1-O7#3   | 155.97(16) | O6#1-Dy1-O1    | 78.67(16)  |
| O1-Dy1-O8#3   | 131.74(15) | O6#2-Dy1-O3#2  | 124.20(16) |
| O2#1-Dy1-O1   | 124.62(15) | O6#2-Dy1-O4#2  | 73.65(15)  |
| O2#1-Dy1-O3#2 | 154.78(15) | O6#2-Dy1-O5    | 123.65(15) |
| O2#1-Dy1-O4#2 | 130.17(16) | O6#2-Dy1-O7#3  | 101.94(16) |
| O2#1-Dy1-O5   | 81.77(15)  | O6#2-Dy1-O8#3  | 149.41(16) |
| O2#1-Dy1-O6#1 | 74.54(15)  | O8#3-Dy1-O3#2  | 73.25(16)  |
| O2#1-Dy1-O7#3 | 77.71(15)  | O8#3-Dy1-O7#3  | 52.46(14)  |

Symmetry transformations used to generate equivalent atoms: #1: 1-x, 1-y, 1-z; #2: -1/2+x, 1/2-y, -1/2+z; #3: -1/2+x, 3/2-y, -1/2+z.

**Table S4.** Continuous Shape Measures calculation for **1-Dy**

| complex | OP-8<br>( $D_{8h}$ )    | HPY-8<br>( $C_{7v}$ )  | HBPY-8<br>( $D_{6h}$ ) | CU-8<br>( $O_h$ ) | SAPR-8<br>( $D_{4d}$ )  | TDD-8<br>( $D_{2d}$ ) | JGBF-8<br>( $D_{2d}$ ) | JETBPY-8<br>( $D_{3h}$ ) |
|---------|-------------------------|------------------------|------------------------|-------------------|-------------------------|-----------------------|------------------------|--------------------------|
|         | 33.365                  | 22.367                 | 11.330                 | 5.407             | 4.471                   | 2.613                 | 13.253                 | 25.630                   |
| 1-Dy    | JBTPR-8<br>( $C_{2v}$ ) | BTPR-8<br>( $C_{2v}$ ) | JSD-8<br>( $D_{2d}$ )  | TT-8<br>( $T_d$ ) | ETBPY-8<br>( $D_{3h}$ ) |                       |                        |                          |
|         | 4.154                   | 3.060                  | 6.516                  | 6.105             | 19.957                  |                       |                        |                          |

OP-8 = Octagon; HPY-8 = Heptagonal pyramid; HBPY-8 = Hexagonal bipyramid; CU-8 = Cube; SAPR-8 = Square antiprism; TDD-8 = Triangular dodecahedron; JGBF-8 = Johnson gyrobifastigium J26; JETBPY-8 = Johnson elongated triangular bipyramid J14; JBTPR-8 = Biaugmented trigonal prism J50; BTPR-8 = Biaugmented trigonal prism; JSD-8 = Snub diphenoid J84; TT-8 = Triakis tetrahedron; ETBPY-8 = Elongated trigonal bipyramid.

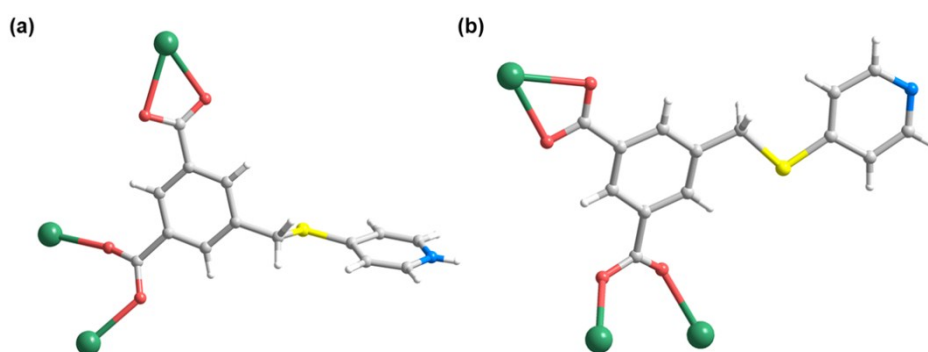**Figure S1.** Coordination models of the ligand in **1-Ln**. Colour schemes for the structure: Dy, green; N, blue; C, light grey, H, white.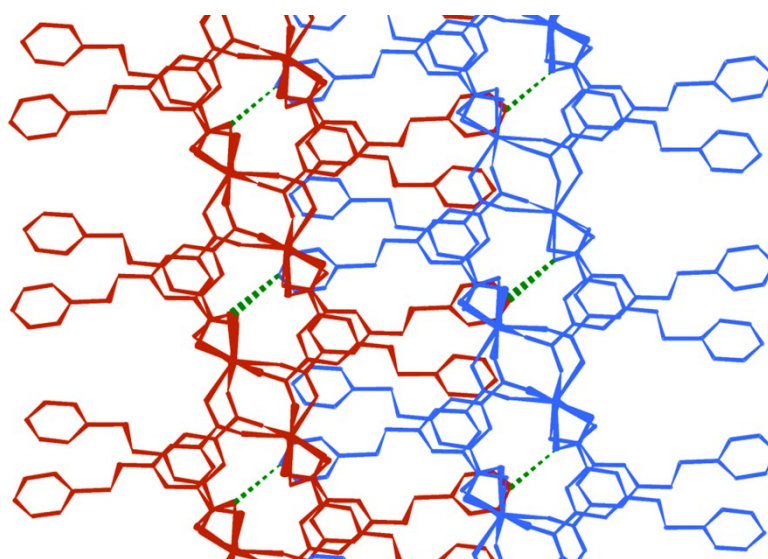**Figure S2.** Hydrogen bonds (green dash lines) between adjacent 2D networks.

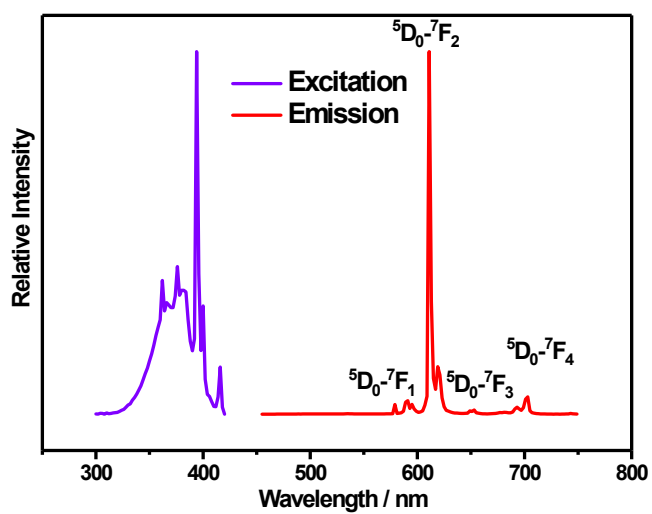

Figure S3. The solid-state luminescent properties of 1-Eu.

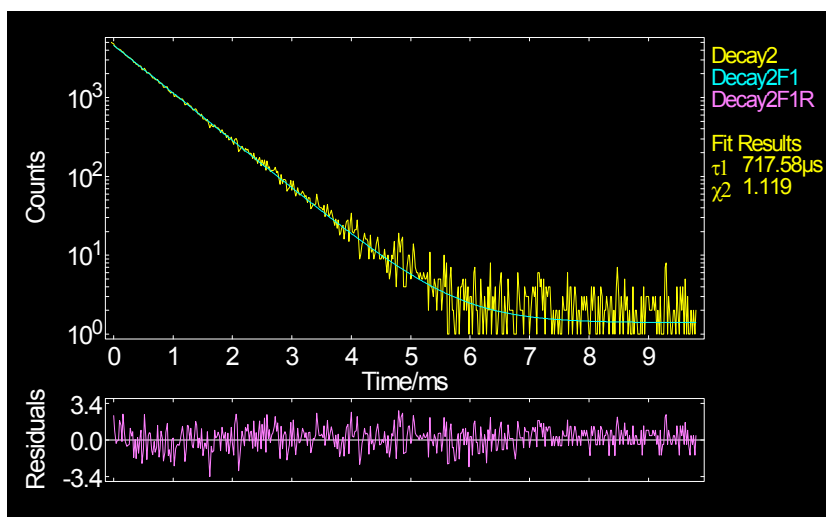

Figure S4. Luminescence decay of 1-Eu measured at the excitation/emission maxima.

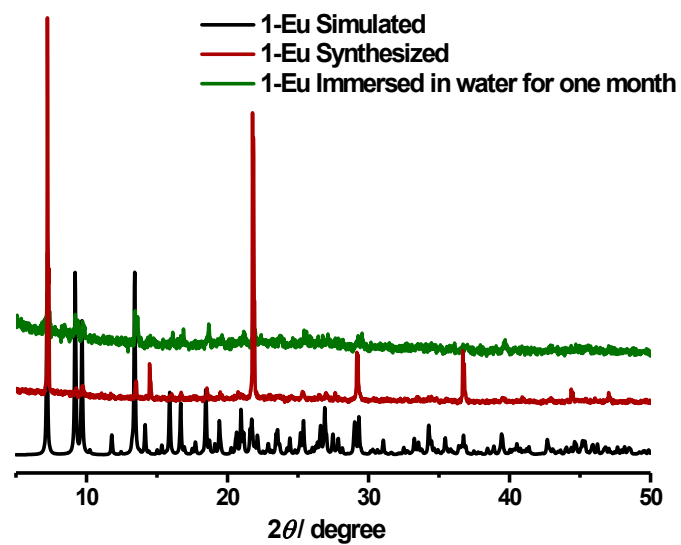

**Figure S5.** PXRD patterns of 1-Eu.

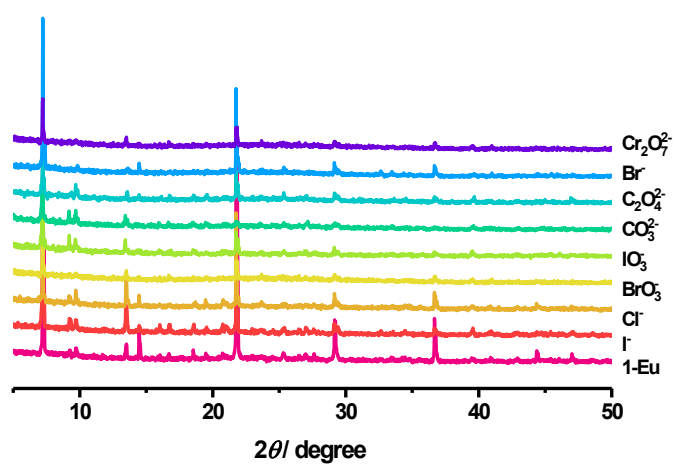

**Figure S6.** PXRD patterns of 1-Eu treated by different anion water solutions.



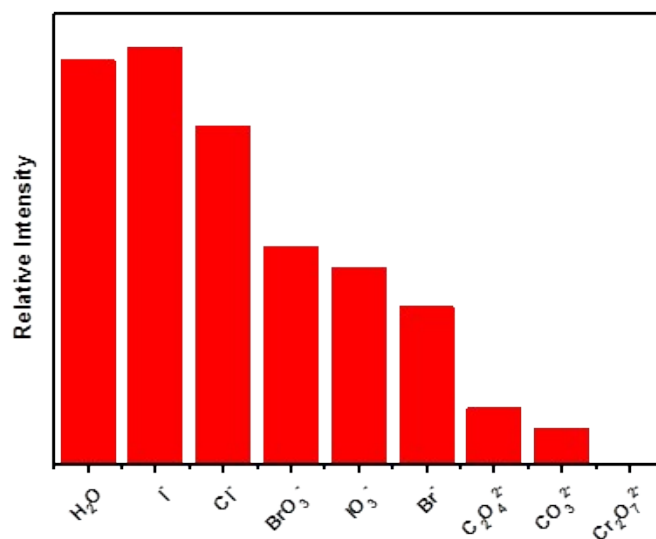

**Figure S7.** The luminescent intensity at 611 nm of 1-Eu in various anion solutions when excited at 394 nm.

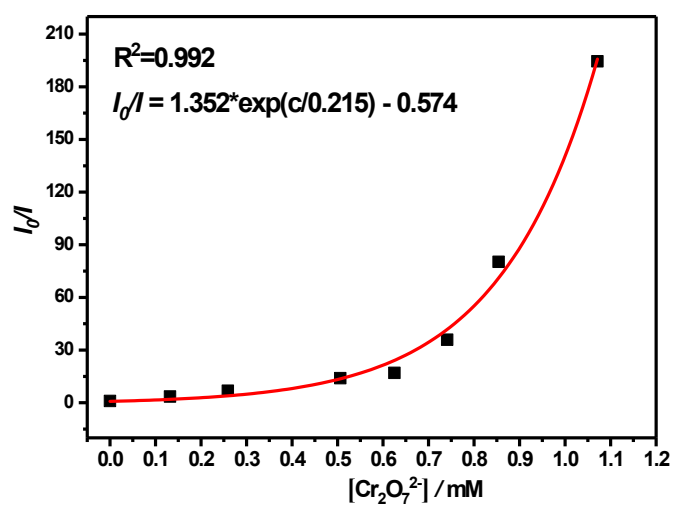

**Figure S8.** The plot of luminescent intensity vs Cr<sub>2</sub>O<sub>7</sub><sup>2-</sup> concentration.

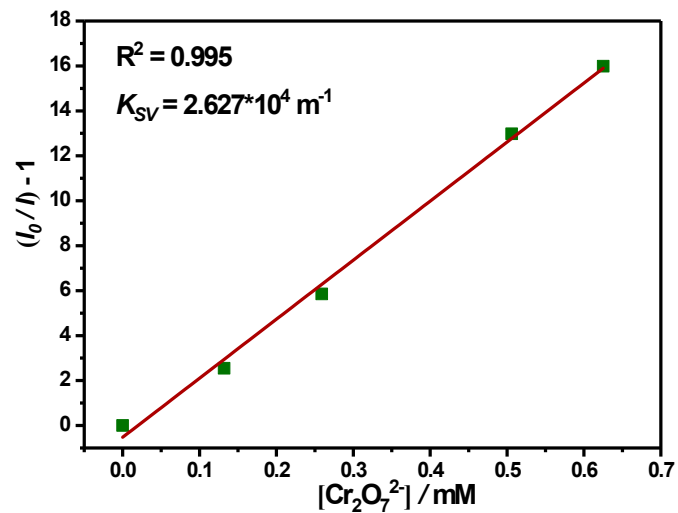

**Figure S9.** The linear correlation for the plot of  $(I_0/I)-1$  vs concentration of  $\text{Cr}_2\text{O}_7^{2-}$  in low concentration range.

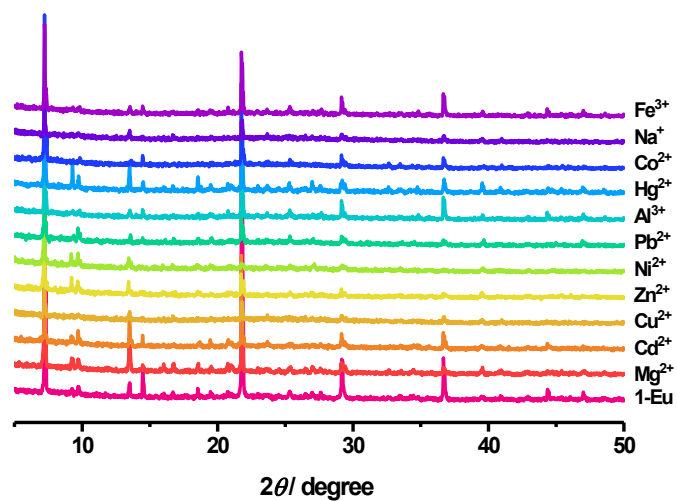

**Figure S10.** The PXRD patterns of **1-Eu** treated by different  $\text{M}(\text{NO}_3)_x$  ( $\text{M} = \text{Fe}^{3+}, \text{Na}^+, \text{Co}^{2+}, \text{Hg}^{2+}, \text{Al}^{3+}, \text{Pb}^{2+}, \text{Ni}^{2+}, \text{Zn}^{2+}, \text{Cu}^{2+}, \text{Cd}^{2+}$  and  $\text{Mg}^{2+}$ ) aqueous solutions.

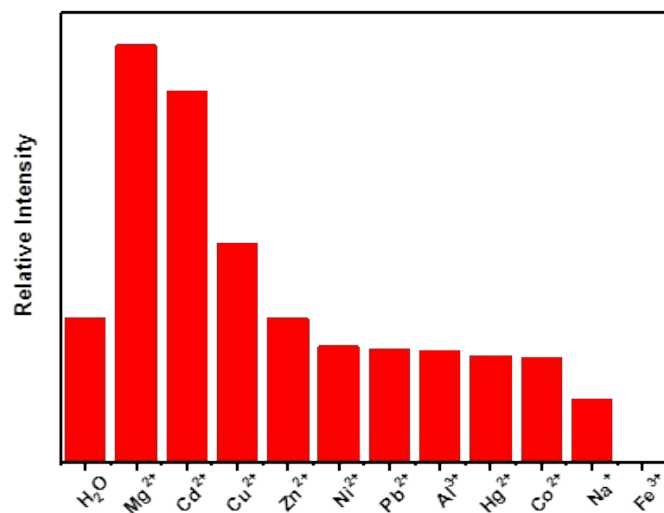

**Figure S11.** The luminescent intensity at 611 nm of 1-Eu in various cation solutions when excited at 394 nm.

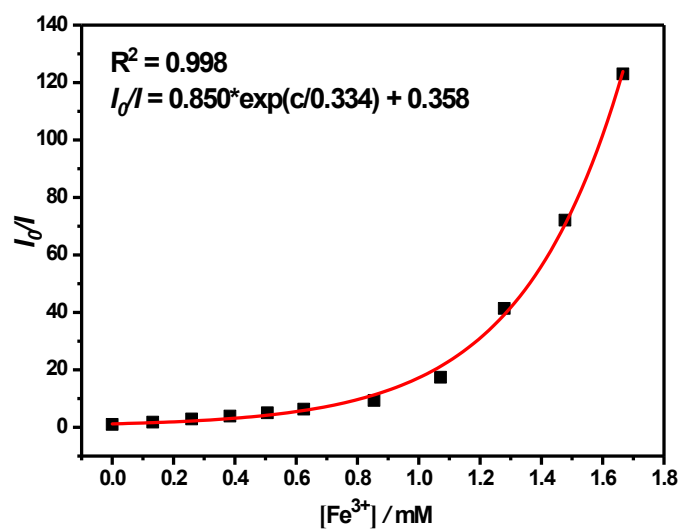

**Figure S12.** The plot of luminescent intensity vs Fe<sup>3+</sup> concentration.

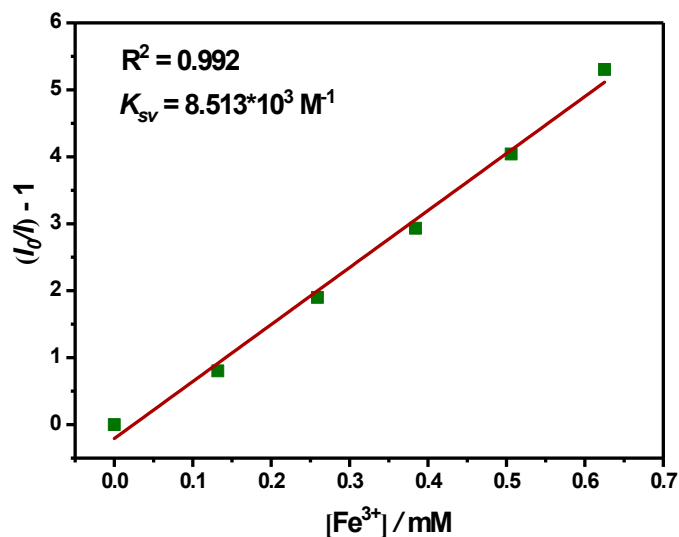

**Figure S13.** The linear correlation for the plot of  $(I_0/I) - 1$  vs concentration of  $Fe^{3+}$  in low concentration range.

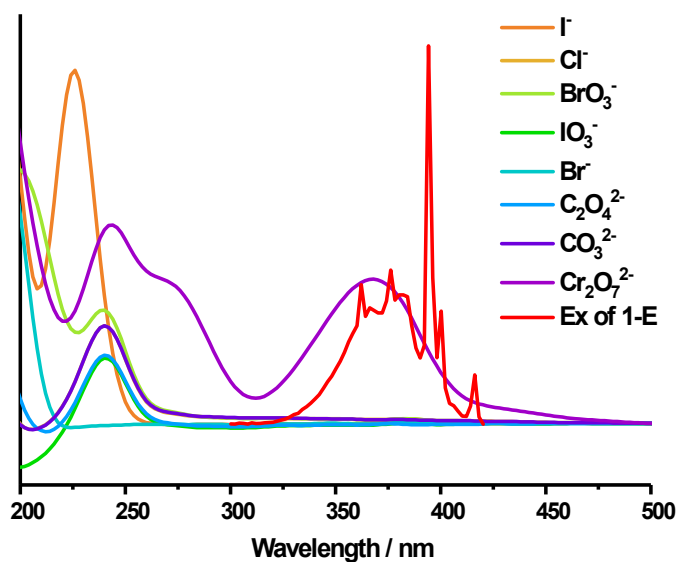

**Figure S14.** UV-Vis adsorption spectra of anion aqueous solutions and the excitation spectrum of **1-Eu**.

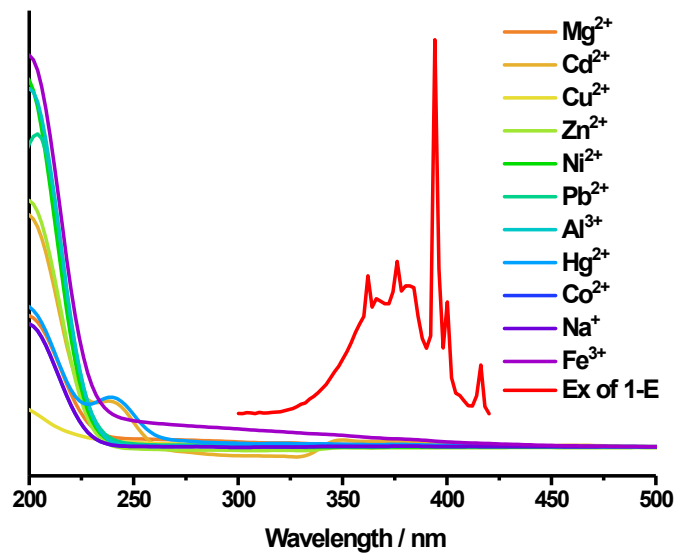

**Figure S15.** UV-Vis adsorption spectra of  $M(\text{NO}_3)_x$  aqueous solutions and the excitation spectrum of **1-Eu**.

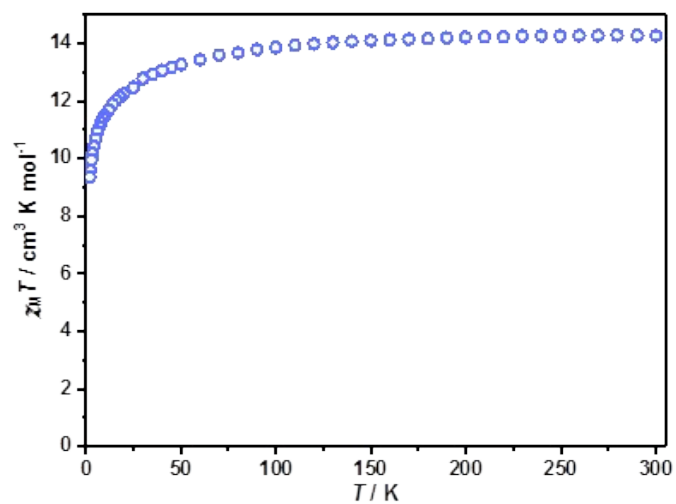

**Figure S16.** Plot of the  $\chi_M T$  versus temperature for **1-Dy** in an applied magnetic field of 1 kOe.

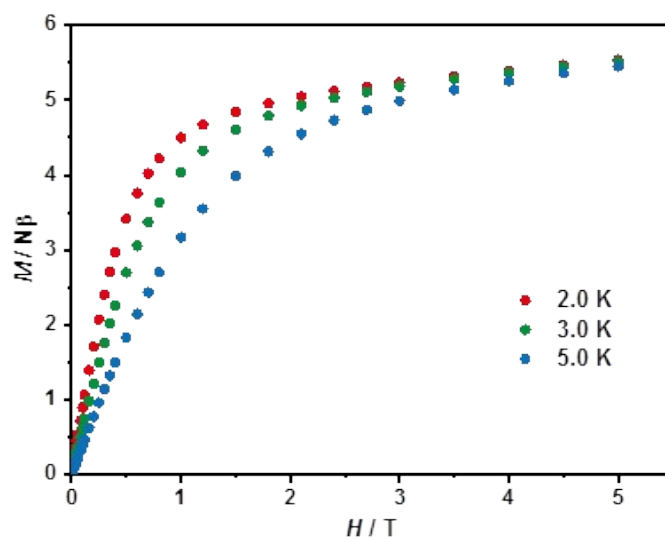

**Figure S17.** Field dependence of the magnetization,  $M$ , at 2, 3 and 5 K for **1-Dy** plotted as  $M$  vs.  $H$ .
